# Supplementary material
Source: MDPI journal article supplement (https://www.mdpi.com/2073-4352/13/5/795)
Supplement: s1 [file s1]

## Effects of $\text{NH}_4\text{SCN}$ additive in the $\text{FAPbI}_3$ perovskite films in a sequential deposition method

**Table S1.** Elemental analysis by energy-dispersive X-ray on bar-shaped morphology in 20% film.

| Element | Weight % | Atomic % | Error % |
|---------|----------|----------|---------|
| Pb M    | 43.20    | 22.16    | 2.55    |
| I L     | 26.31    | 22.04    | 1.87    |
| Si K    | 6.12     | 23.18    | 0.61    |
| S K     | 0.04     | 0.14     | 0.06    |
| C K     | 0.03     | 0.27     | 0.17    |
| N K     | 0.00     | 0.00     | 0.00    |

**Table S2.** Elemental Analysis by energy-dispersive X-ray of p-40% film after first annealing.

| Element | Weight % | Atomic % | Error % |
|---------|----------|----------|---------|
| Pb M    | 40.16    | 22.16    | 2.55    |
| I L     | 38.04    | 22.04    | 1.87    |
| Si K    | 8.78     | 23.18    | 0.61    |
| S K     | 1.19     | 0.14     | 0.06    |
| C K     | 1.18     | 0.27     | 0.17    |
| N K     | 0.69     | 0.00     | 0.00    |

**Table S3.** Elemental Analysis by energy-dispersive X-ray of 40% film after second annealing.

| Element | Weight % | Atomic % | Error % |
|---------|----------|----------|---------|
| Pb M    | 28.29    | 7.25     | 1.47    |
| I L     | 37.02    | 15.50    | 1.53    |
| Si K    | 18.38    | 34.76    | 1.01    |
| S K     | 0.01     | 0.01     | 0.03    |
| C K     | 0.04     | 0.17     | 0.13    |
| N K     | 2.68     | 10.18    | 1.33    |

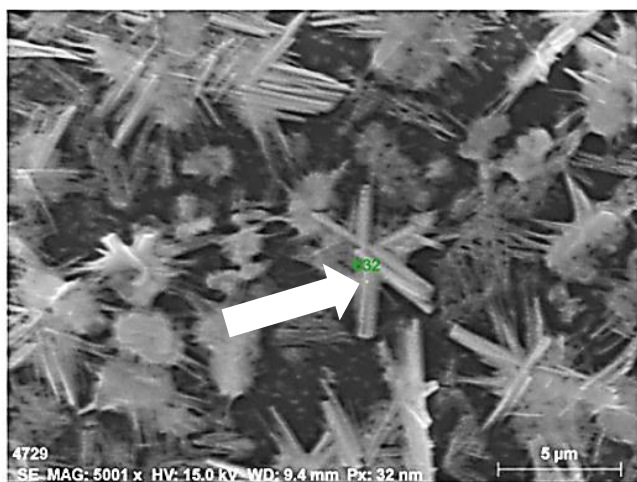

4729Date:8/5/2022 1:45:09 PMImage size:800 x 600Mag:5001xHV:15.0kV

**Table S4.** Elemental Analysis by energy-dispersive X-ray of p-50% film over a precipitate.

| Element | Weight % | Atomic % | Error % |
|---------|----------|----------|---------|
| Pb M    | 41.52    | 13.27    | 2.01    |
| I L     | 34.54    | 18.02    | 1.63    |
| Si K    | 9.44     | 22.26    | 0.64    |
| S K     | 3.65     | 7.54     | 0.34    |
| C K     | 1.72     | 9.46     | 1.03    |
| N K     | 1.62     | 7.66     | 1.21    |

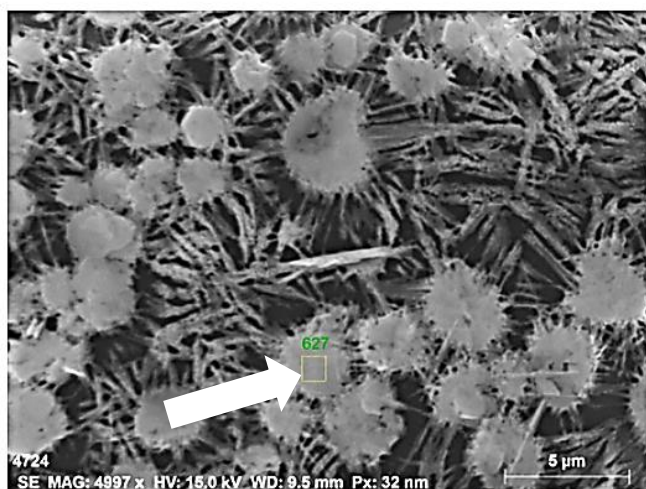

4724Date:8/5/2022 1:33:02 PMImage size:800 x  
600Mag:4997xHV:15.0kV

**Table S5.** Elemental Analysis by energy-dispersive X-ray of p-50% films over a waffle morphology.

| Element | Weight % | Atomic % | Error % |
|---------|----------|----------|---------|
| Pb M    | 37.60    | 16.86    | 1.21    |
| I L     | 50.12    | 36.70    | 1.44    |
| Si K    | 6.67     | 22.07    | 0.33    |
| S K     | 0.00     | 0.00     | 0.00    |
| C K     | 0.18     | 1.42     | 0.18    |
| N K     | 0.00     | 0.00     | 0.00    |

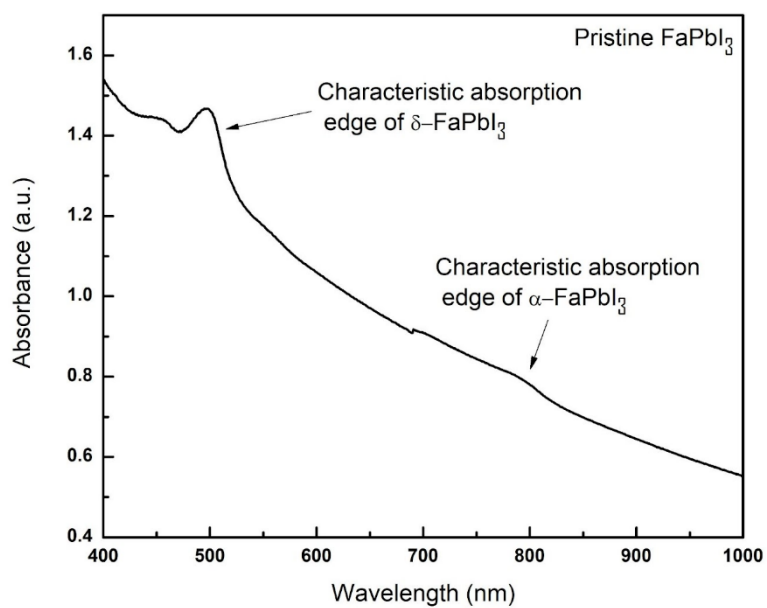

**Figure S1.** Absorbance spectrum of pristine  $\text{FAPbI}_3$  (0% of  $\text{NH}_4\text{SCN}$ ).

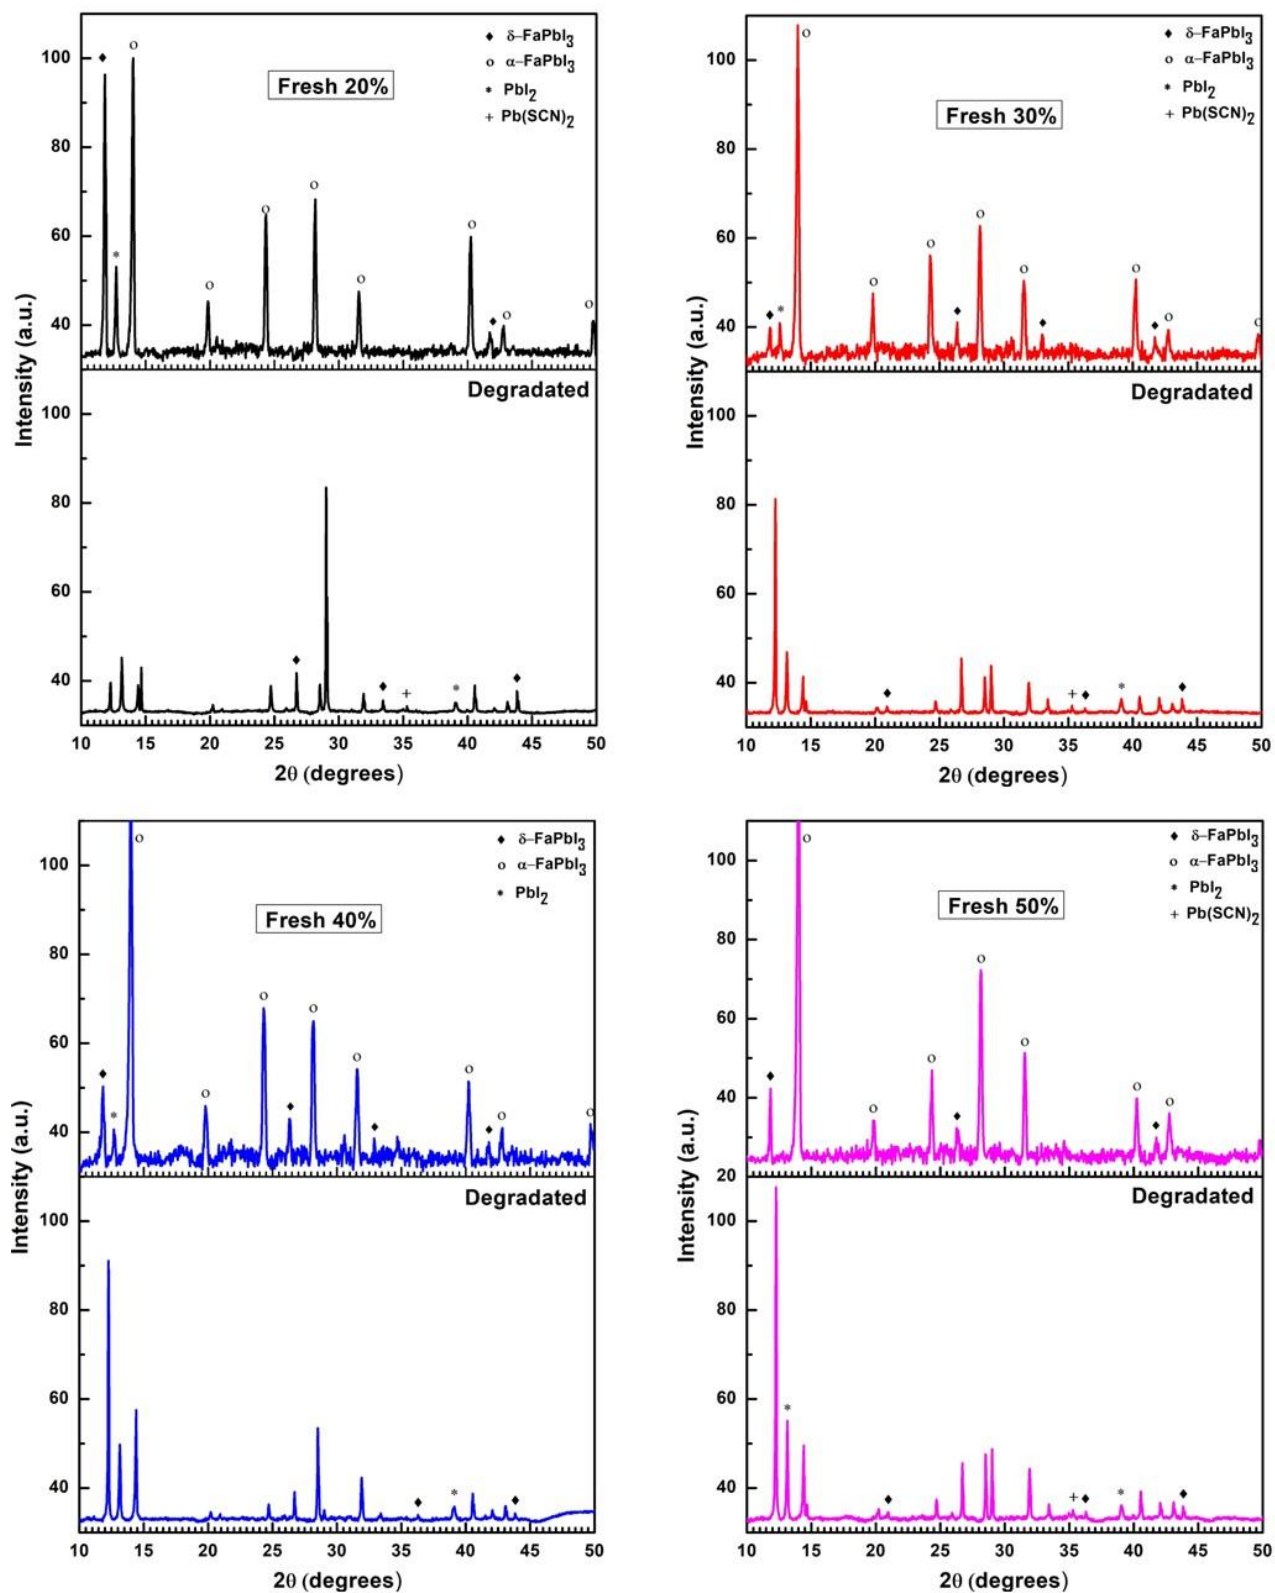

**Figure S2.** Comparative XRD patterns between fresh FAPbI<sub>3</sub> and degraded FAPbI<sub>3</sub> with different concentration of NH<sub>4</sub>SCN.

## Additional information of p-80% and 80% film

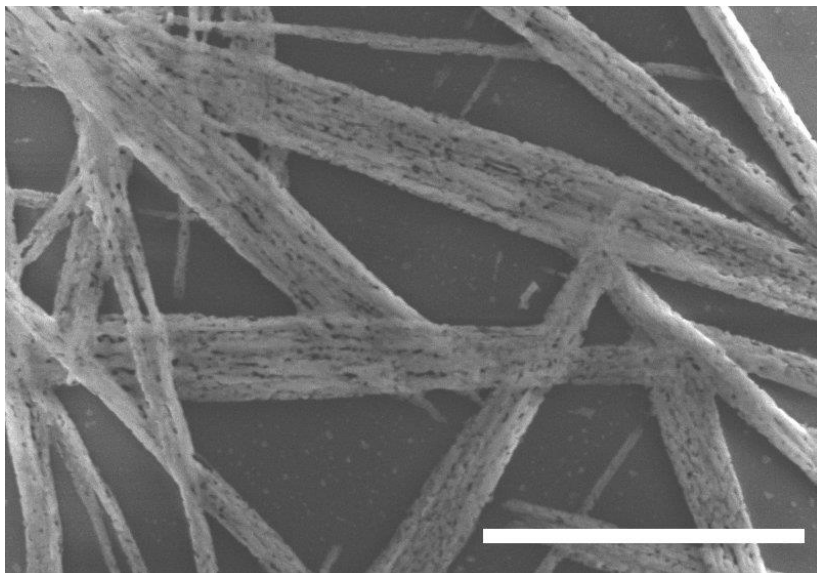

**Figure S3.** Top-view SEM micrograph of p-80% film. The white scale bar indicates 10  $\mu\text{m}$ .

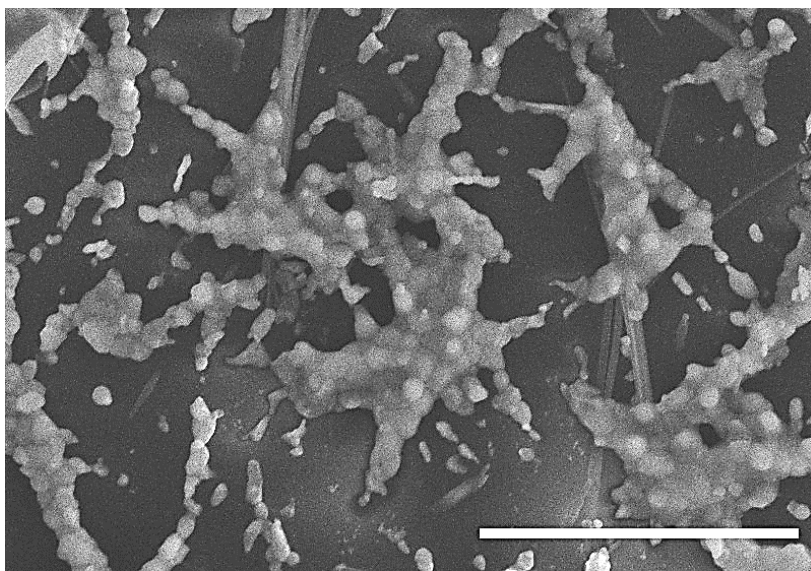

**Figure S4.** Top-view SEM micrograph of FAPbI<sub>3</sub> perovskite film with 80% concentration of NH<sub>4</sub>SCN. White scale bar indicates 10  $\mu\text{m}$ .

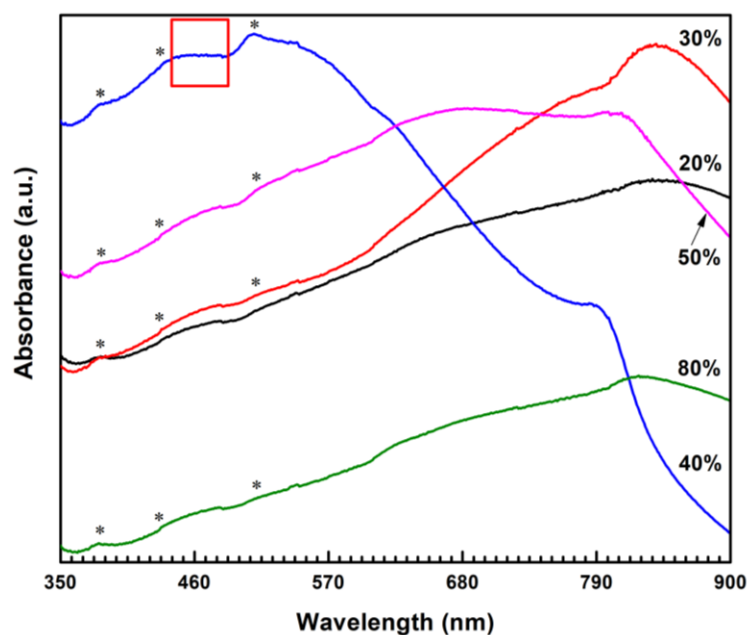

**Figure S5.** Absorbance UV-Vis light spectra of FAPbI<sub>3</sub> perovskite films with different concentration of NH<sub>4</sub>SCN including 80%.

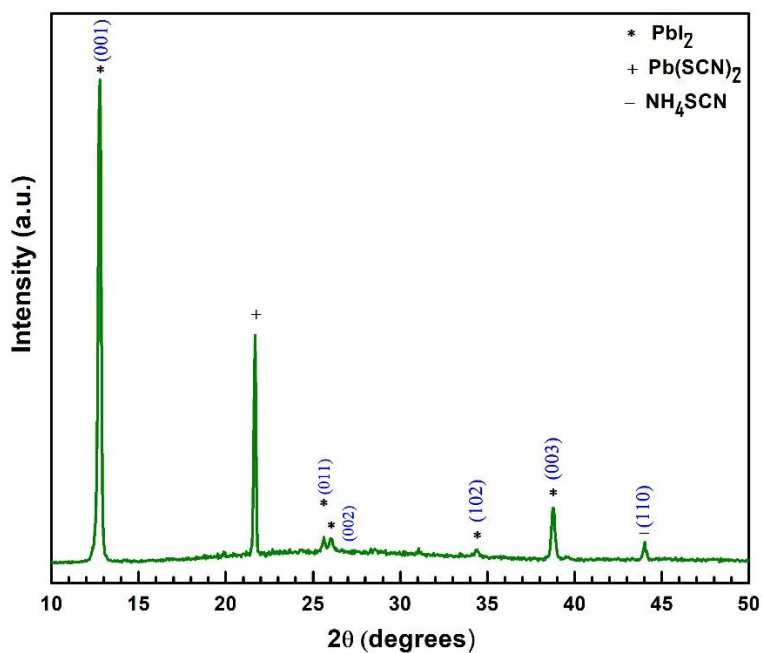

**Figure S6.** XRD patterns of the FAPbI<sub>3</sub> perovskite film with 80% concentration of NH<sub>4</sub>SCN
